# Supplementary material for: Metabolic engineering of Escherichia coli for optimized biosynthesis of nicotinamide mononucleotide, a noncanonical redox cofactor
Source: bioRxiv or medRxiv preprint supplement (doi:10.1101/2020.05.11.089011), 2020-05-13
Supplement: Supplementary file [file media-1.pdf]

# **Metabolic engineering of *Escherichia coli* for optimized biosynthesis of nicotinamide mononucleotide, a noncanonical redox cofactor**

William B. Black<sup>1</sup>, Derek Aspacio<sup>1</sup>, Danielle Bever<sup>1</sup>, Edward King<sup>2</sup>, Linyue Zhang<sup>1</sup>, and Han Li<sup>1,\*</sup>

Departments of Chemical and Biomolecular Engineering<sup>1</sup>, Molecular Biology and Biochemistry<sup>2</sup>, University of California, Irvine. \*To whom correspondence should be addressed

## **Supplementary information**

**Supplementary Figure 1:** *Francisella tularensis* NadE\*-based Growth Restoration is Not Nicotinamide Feeding Dependent.

**Supplementary Figure 2:** Intracellular NAD<sup>+</sup> Decreases in NMN<sup>+</sup> Accumulating Strains.

**DNA sequences of genes used in this study**

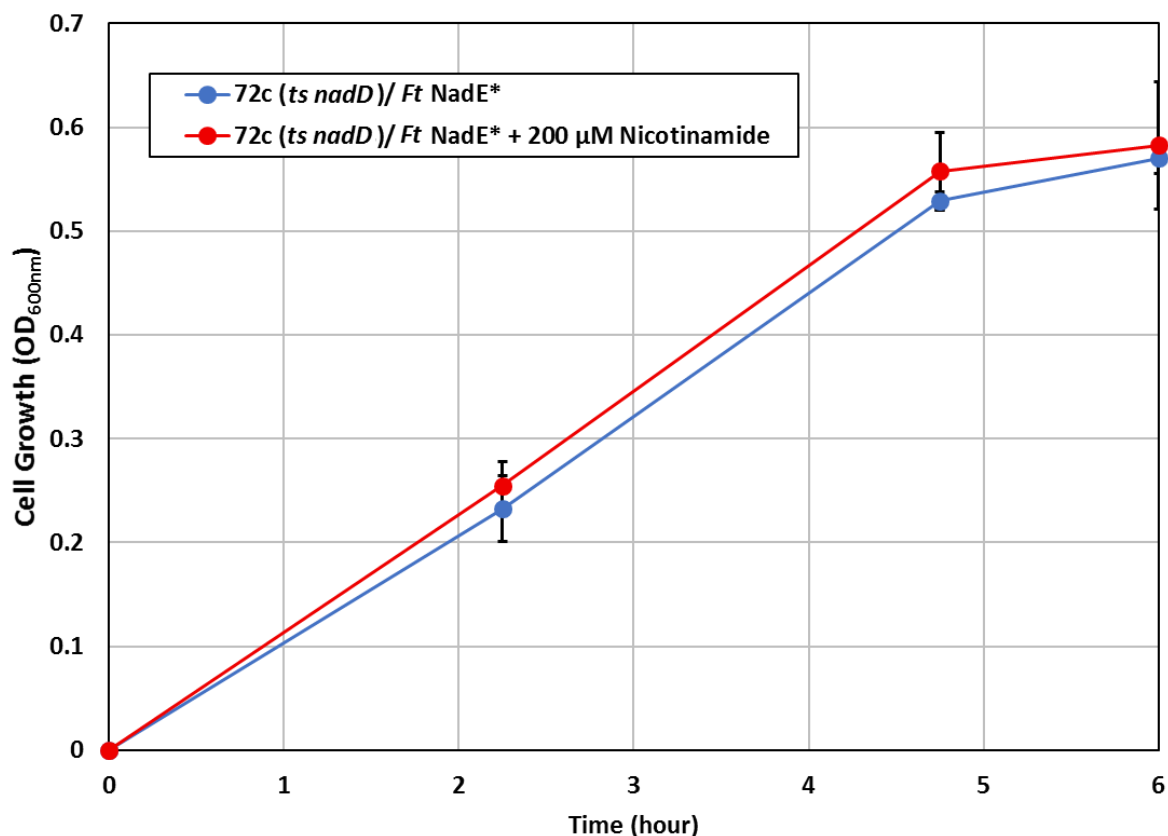

**Supplementary Figure 1: *Francisella tularensis* NadE\*-based Growth Restoration is Not Nicotinamide Feeding Dependent.**

A growth restoration platform was used to screen pathways for the efficient generation of nicotinamide mononucleotide (NMN<sup>+</sup>). The *Escherichia coli* strain 72c [1] contains a temperature sensitive allele of *nadD* (*ts nadD*). As a result, this strain cannot grow at 42 °C. By overexpressing *Francisella tularensis* *nadE\**, cells are able to produce NMN<sup>+</sup>, which can then be converted to NAD<sup>+</sup>, and thus restoring growth. We observed no dependence of growth restoration with feeding 200 μM nicotinamide (NA). This indicates either efficient NMN<sup>+</sup> generation can be achieved through channeling the intermediate nicotinic acid mononucleotide (NaMN<sup>+</sup>) from *E. coli*'s native *de novo* NAD<sup>+</sup> biosynthesis pathway, or LB medium used in this experiment already contains sufficient precursors for this pathway. Screening was performed in a deep-well 96-well plate containing 1 mL of LB medium supplemented with 2 g/L D-glucose and 200 μM of NA if applicable. Detailed conditions are described in the Methods section.

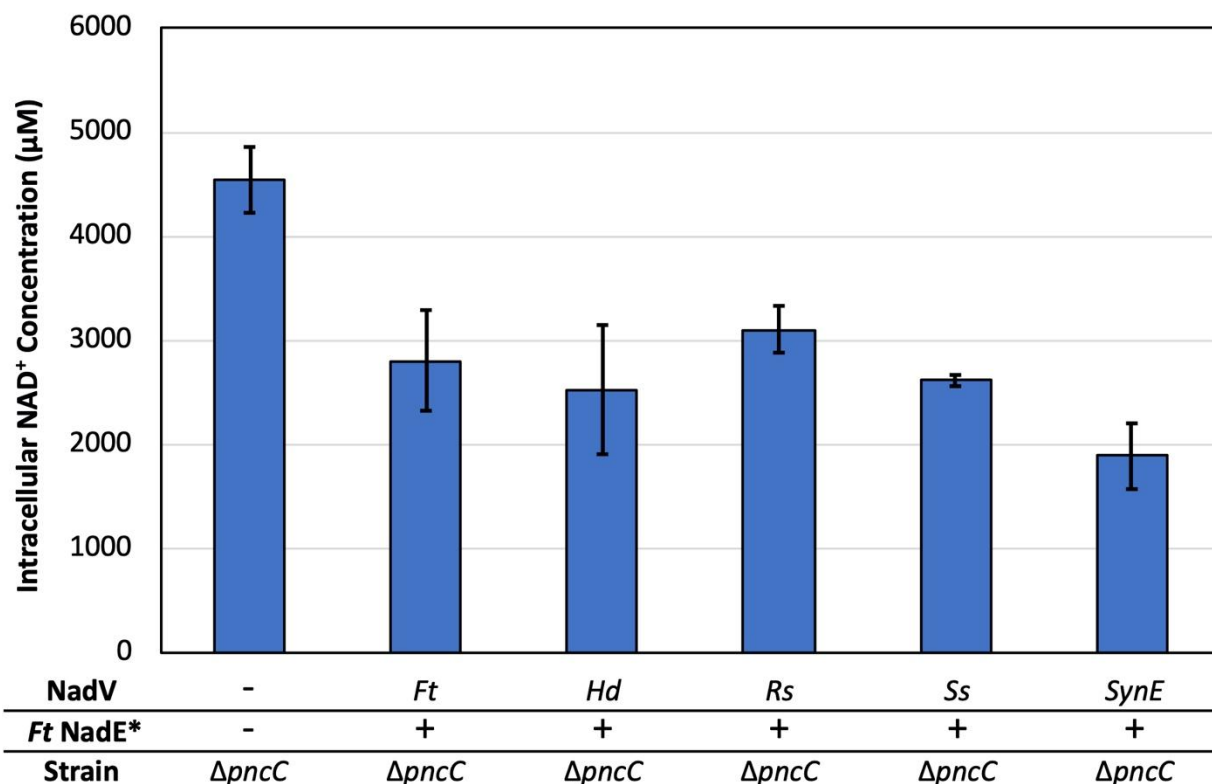

### Supplementary Figure 2: Intracellular NAD<sup>+</sup> Decreases in NMN<sup>+</sup> Accumulating Strains

From Figure 3, co-overexpression of NMN<sup>+</sup> generating *Francisella tularensis* NadE\* and NadVs increases intracellular NMN<sup>+</sup> when the NMN<sup>+</sup> degrading PncC is disrupted. However, as shown here, NAD<sup>+</sup> levels decreased in cells expressing *F. tularensis* NadE\* and NadV compared to cells without overexpression. This potentially indicates NMN<sup>+</sup> plays a regulatory role in NAD<sup>+</sup> biosynthesis. Cells were cultured in 2xYT medium supplemented with 1 mM nicotinamide at 30 °C for four hours. Intracellular NAD<sup>+</sup> concentrations were determined by UPLC-MS/MS. Detailed conditions and analytical techniques are described in the Methods section.

## DNA sequences of genes used in this study

### *Escherichia coli* BL21 *yqhD*

ATGAACAACCTTTAATCTGCACACCCCAACCCGCATTCTGTTTGGTAAAGGCGCAATC  
GCTGGTTTACGCGAACAAATTCCTCACGATGCTCGCGTATTGATTACCTACGGCGGC  
GGCAGCGTGAAAAAACC GGCGTTCTCGATCAAGTTCTGGATGCCCTGAAAGGCAT  
GGACGTGCTGGAATTTGGCGGTATTGAGCCAAACCCGGCTTATGAAACGCTGATGA  
ACGCCGTGAAACTGGTTCGCGAACAGAAAGTGACTTTCCTGCTGGCGGTTGGCGGC  
GGTTCTGTACTGGACGGCACCAAATTTATCGCCGACGGCTAACTATCCGGAAAAT  
ATCGATCCGTGGCACATTCTGCAAACGGGCGGTAAAGAGATTAAGCGCCATCCC  
GATGGGCTGTGTGCTGACGCTGCCAGCAACCCGGTTCAGAATCCAACGCAGGCGCGG  
TGATCTCCCGTAAAACACAGGCGACAAGCAGGCGTTCCATTCTGCCATGTTACG  
CGGTATTTGCCGTGCTCGATCCGGTTTATACCTACACCCTGCCGCCGCGTCAGGTGG  
CTAACGGCGTAGTGGACGCCTTTGTACACACCGTGGAACAGTATGTTACCAAACCGG  
TTGATGCCAAAATTCAGGACCGTTTCGCAGAAAGGCATTTTGCTGACGCTAATCGAAG  
ATGGTCCGAAAGCCCTGAAAGAGCCAGAAAACACTACGATGTGCGCGCCAACGTCATG  
TGGGCGGCGACTCAGGCGCTGAACGGTTTGATTGGCGCTGGCGTACCGCAGGACTG  
GGCAACGCATATGCTGGGCCACGAACTGACTGCGATGCACGGTCTGGATCACGCGC  
AAACTGGCTATCGTCCTGCCTGCACTGTGGAATGAAAAACGCGATACCAAGCGC  
GCTAAGCTGCTGCAATATGCTGAACGCGTCTGGAACATCACTGAAGGTTCCGATGAT  
GAGCGTATTGACGCCGCGATTGCCGCAACCCGCAATTTCTTTGAGCAATTAGGCGTG  
CCGACCCACCTCTCCGACTACGGTCTGGACGGCAGCTCCATCCCGGCTTTGCTGAAA  
AAACTGGAAGAGCACGGCATGACCCAACTGGGCGAAAATCATGACATTACGTTGGA  
TGTCAGCCGCCGTATATACGAAGCCGCCCGCTAA

### *Francisella tularensis nadE\** (Codon optimized for *E. coli*)

ATGAAAATCGTTAAGGATTTTAGCCCGAAAGAATACTCCCAAAGCTGGTAAATTG  
GTTGAGCGACTCATGTATGAACTACCCGGCCGAGGGATTCGTTATCGGCTTGAGTGG  
TGGTATTGACTCAGCCGTCGCGGCCTCATTGGCTGTCAAACGGGCCTTCCTACGAC  
TGCCTTAATTTTGCCGTCCGATAATAATCAGCATCAAGATATGCAGGATGCACTGGA  
GTTGATCGAAATGCTTAACATTGAGCACTATACTATCTCGATCCAACCGGCGTATGA  
GGCCTTCCTGGCTTCTACACAGAGTTTCACCAATCTTCAGAATAATCGTCAACTTGTC  
ATTAAAGGCAACGCCCAGGCTCGTCTGCGCATGATGTATCTGTATGCATACGCCCAA  
CAATACAATCGTATCGTCATTGGCACCCGACAATGCGTGCGAATGGTACATGGGTTAT  
TTCACGAAGTTTGGCGATGGTGCTGCCGACATTCTGCCACTGGTAAACCTTAAAAAG  
TCACAAGTTTTTTGAGCTGGGTAAATATCTGGACGTTCCCAAATAATCTTAGACAAG  
GCTCCGTCGGCTGGATTGTGGCAAGGGCAAACCGACGAGGATGAAATGGGGGTTAC  
CTATCAAGAGATTGACGACTTCTTAGATGGGAAACAGGTTAGTGCCAAGGCCCTGG  
AGCGTATCAATTTCTGGCATAACCGCTCGCATCATAAACGTAAATTAGCTTTGACCC  
CAAACCTTTtaa

*Salmonella enterica pnuC\** KA, red text indicates the KA insertion made to the DNA sequence

ATGGATTTTTTTAGTACGCACAACATACTGATTCATATTCCGATTGGCGCTGGCGGG  
TACGATCTCTCGTGGATCGAAGCGGTAGGAACCATCGCCGGCCTGCTCTGTATTTGG  
CTTGCCAGTCTGGAGAAGATCAGCAACTACTTTTTTGGACTGGTTAACGTTACCCTG  
TTTGGCATTATTTTCTTTCAGATCCAGCTTTATGCCAGCCTGTTGCTGCAACTCTTTTT  
CTTTGCCGCAATATTTATGGCTGGTATGCGTGGTTCGCGGCAAACAAAGGATAATCA  
AGCCGAGCTTAAAATCCGCTGGCTGCCGTTGCCAA**AAAGCA**AAAGCAATGGCATGGC  
TGCGGATATGTGTGATAGCTATCGGTTTGATGACGCGATATATCGATCCCGTATTCG  
CCGTCCTGACGCGCGTGGCCGTCGCCATTATGCAGATGCTGGGGTTACAGGTGACAA  
TGCCCGTACTGCAACCGGACGCTTTCCCGTTCTGGGACTCTTGATGATGGTGTCTGTC  
TATCGTGGCGATGATTCTGATGACACGCAAATATGTGAAAACCTGGCTCCTGTGGGT  
GATAATCAACGTGATCAGTGTGGTGATTTTTGCTTTGCAGGGCGTCTATGCGATGTC  
GCTGGAATATCTGATCCTGACATTTATCGCCGTGAACGGTAGCCGCCTGTGGATAAA  
CAGCGCGCGGGAGCGAGGATCGCGCGCGCTTTCCCGTTAA

*Escherichia coli BL21 pnuC*

ATGGATTTTTTTAGTGTGCAGAATATCCTGGTACATATAACCAATAGGGGCAGGCGGT  
TATGATCTCTCATGGATCGAAGCGGTAGGCACGATCGCCGGGTTGCTGTGTATTGGC  
CTTGCCAGTCTGGAGAAGATCAGCAACTACTTCTTTGGCCTGATCAACGTCACCTTG  
TTTGGCATTATTTTCTTTCAGATTCAGCTGTATGCCAGCCTGCTATTACAGGTGTTTTT  
CTTTGCCGCGAATATTTACGGTTGGTATGCGTGGTTCGCGACAAACCAGTCAGAACGA  
GGCGGAGTTGAAAATTCGCTGGTTGCCATTGCCGAAGGCACTCAGCTGGTTGGCGGT  
TTGCGTTGTTTCGATTGGTCTGATGACGGTATTTATCAATCCGGTGTTTGCATTTTTG  
ACCCGCGTGGCAGTCATGATCATGCAAGCATTAGGATTACAGGTTGTGATGCCTGAA  
CTGCAACCGGACGCTTTCCCGTTCTGGGATTCATGCATGATGGTGTATCTATCGTGG  
CAATGATTCTGATGACGCGTAAGTATGTGGAAAACCTGGCTGTTGTGGGTGATTATTA  
ACGTGATTAGCGTCGTTATTTTTGCACTTCAGGGCGTTTACGCCATGTCTCTGGAGTA  
CATCATCCTGACCTTTATTGCGCTCAACGGCAGCCGGATGTGGATCAACAGCGCACG  
TGAAAGAGGCTCACGCGCGCTGTCCCATTA

*Salmonella enterica nadR*

ATGCGATTTTTCCAGCAGGAGGCTCTTGTGTCATCGTTTCGACTATCTCAAACCGCG  
ATTAAGCAGCAAGGTTGCACTCTGCAACAGGTGGCTGACGCCAGCGGTATGACCAA  
GGGATATCTGAGTCAGTTACTTAACGCCAAAATCAAAGCCCCAGCGCGCAAAAAC  
TGAGGGCGCTACACCGTTTTCTCGGGCTGGAGTTTCCCCGCCGACAGAAAAACATTG  
GCGTGGTGTTCGGTAAATTTTATCCATTGCATACCGGACACATCTACTTGATCCAGC  
GCGCCTGTAGCCAGGTGGATGAGTTGCACATCATTATGGGATATGACGATACGCGC  
GACCGCGGGCTGTTTGAGGATAGCGCCATGTCGCAGCAGCCCACCGTGTCCGGATCG  
CCTGCGCTGGTTATTGCAAACCTTCAAATACCAAAAAAATATTCGCATCCACGCCTT

TAATGAAGAGGGGATGGAGCCTTATCCGCATGGCTGGGACGTCTGGAGCAACGGCA  
TTAAAGCGTTTATGGCAGAGAAGGGAATACAGCCGAGCTGGATCTACACTTCCGAA  
GAGGCTGATGCGCCGAGTATCTTGAGCATTTAGGGATTGAGACGGTGCTGGTCGAT  
CCTGAACGCACGTTTATGAATATCAGTGGGGCGCAAATCCGCGAAAATCCGTTTCGT  
TACTGGGAATATATTCCTACCGAAGTGAAGCCGTTTTTTCGTGCGTACCGTCGCGATT  
CTGGGCGGGGAATCAAGCGGCAAGTCTACGCTGGTCAATAAGCTCGCCAATATTTTT  
AATACCACCAGCGCCTGGGAATATGGCCGCGACTATGTCTTTTCGCATCTGGGCGGC  
GATGAGATGGCGTTACAGTATTCGACTACGATAAAATTGCGCTGGGCCATGCGCA  
ATATATTGATTTTCGCAGTAAAATATGCGAATAAAGTGGCGTTTATCGATACCGATTT  
CGTCACCACCCAGGCATTTTGCAAAAAATACGAAGGACGCGAGCATCCCTTTGTCCA  
GGCGCTGATCGACGAGTATCGCTTCGACCTGGTGATTTTGCTGGAGAATAATACGCC  
GTGGGTAGCTGACGACTGCGAAGCCTGGGCAGTTCAGTGGATCGCAAAGCGTTCC  
AGAACCTGCTGGTCGAGATGCTGAAAGAGAACAACATTGAGTTCGTTACGTTAAA  
GAGGCTGATTACGATGGTCGCTTTTTGCGCTGTGTGGAAGTGGTGAAAGAGATGATG  
GGCGAGCAGGGATAA

*Saccharomyces cerevisiae* **BY4741 NRK1**

ATGACTTCGAAAAAAGTGATATTAGTTGCATTGAGTGGATGCTCCTCCAGTGGTAAG  
ACGACAATTGCGAACTTACAGCAAGTTTATTCACGAAGGCTACATTAATTCATGAA  
GATGACTTTTACAAACATGATAATGAAGTGCCAGTAGATGCTAAATATAACATTCAA  
AATTGGGATTCGCCAGAAGCTCTTGATTTTAACTTTTCGGTAAAGAATTAGATGTG  
ATCAAACAACTGGTAAAATAGCCACCAAATATAACACAATAACAACGTAGATGA  
TCCCTTTACAAAGTTCCACATTGATAGACAAGTTTGGGACGAGTTAAAGGCTAAGTA  
TGACTCTATTAATGACGACAAATATGAAGTTGTAATTGTAGATGGGTTTATGATTTT  
CAATAATACTGGAATATCAAAAAAATTTGATTTGAAGATATTAGTGCGTGCTCCCTA  
TGAAGTACTAAAAAAAAGGAGGGCTTCCAGAAAAGGATACCAGACTTTGGATTCTT  
TCTGGGTGGATCCGCCGTATTATTTTCGACGAATTTGTGTATGAATCTTATCGTGCAA  
TCATGCGCAGTTATTTGTTAATGGAGACGTAGAAGTTTACTAGACCCAAGGAAGTC  
AAAGAATATAAAAGAGTTCATAAATGATGATGACACTCCAATTGCGAAACCTTTAA  
GCTGGGTGTGCCAAGAGATTCTAAAGCTTTGTAAGGATTAG

*Francisella tularensis nadV* (Codon optimized for *E. coli*)

ATGTCGTTTGATAACCTGCTGTTGATGACGGATTCCCTATAAACATAGTCACCGTTAC  
CAATATCCTCGCGATACCCATTATCTGCATTTTTATCTGGAATCACGCGGGACCGCT  
ACAAGGATCTGGGCAACTATACGAAATTCTTCGGATTGCAGTATTACGTTAAAAAG  
TATCTTTCCCAACCCATTACCCAGCAGATGATCGACGATGCAGAGAAGATCTTACTT  
GCCACGGGCTTCCGTTCTACCGTAGTGGGTTTCGAGAAGATCCTTAATAATTATAAC  
GGATACCTGCCGATTCGTATCCGTGCCGTGCGTGAAGGTAGTTAATCCCGCTGCAT  
AATGTATTAATGACGATTGAGTCGACGGACGAAGAGCTTTTCTGGCTTCCGGGCTTC  
GTAGAACTCTGCTGTTGAAGGTATGGTACCCAACGACTGTAGCTACGATTAGCTTT  
AATATCAAACAACTGATTAACGTTACTTGTTGGAGACGGCAGACTCGCTTGATAAG

TTAGACTTTATGTTGCATGACTTTGGATACCGCGGTGTCTCTAGTGAGGAGTCAGCA  
GGTATTGGGGGGGCCGCGCATCTGACCAATTTTTGGGCACCGATAATTAGCGGCC  
CTTCATGTTTGTAAAGAGTTCTATGCGGAGGACATGGCAGGATTTCCATCCCTGCG  
TCGGAACATTCAACTATGACTAGCTGGGGCGTGGGGACCGAGTGTGAGCGCGAAGC  
GTTTGAAAATATGATTGCGCAGTTCGGTGACTCTTCGGTCTTATATGCTTGTGTCTCT  
GACTCATGGGACTTTAAAAAAGCGATCCAGACCTGGGTAGACTTGAAAGACCGCGT  
TACCGCCAAAAGGCGAACTTAGTAATCCGTCCAGACAGTGGCGACGCCGTAGATA  
ACATTTTGTACGCGCTTTATGAACTTGACAAAGGGTATGGATCACGTTTAAATAGTA  
AGGGGTACAAAGTTTTAAACAATGTAGCACTTATTCAAGGGGACTCTGTTTCTATTT  
CGTTAGCGAAGAAAGTTTTAGAGGCCATGAAAATTCAAGGCTACTCCGCAGAGAAC  
ATTGCATTCGGGATGGGAGGGGCTCTTCTGCAAGGGAACACTACGAATCGTCGATCAA  
CCGCGACAGCTTCAAATTCGCAATCAAATGTTCTGCTATTATGCGCGGTAATACTTT  
AATCGGCGTTAAGAAGGAGCCAATTACCGATCTTGCTAAGAAATCAAACAGGGTC  
GTTTGGATCTTATTAAGGACGCGAAAGGAAATTACAAAACGATCGTACTGGACGAC  
TCGTATGCGTTAGGTGAGTATCATCCGGAATCTCAATTGCAAACCTACTATGATAAT  
GGCGAGATCAAGTTTGAACAGAGCCTTGCCCAGATCCGTAATTACACAAATTA

***Ralstonia solanacearum nadV* (Codon optimized for *E. coli*)**

ATGCAGAACGACCTGCCTGGTTTGTCCGCTATCCTTAGCAACCCAATCTTAAATACC  
GACAGTTACAAGGCGTCGCATTACCTGCAATACCCAGCCGGTACTTCGGCGATGTTCC  
TCCTACGTAGAATCCCGTGGAGGTTCGTTATGATCGTACCGTTTTCTTCGGACTTCAA  
TGCTGGCAAAGGAATACTTATGCCGTCCTATTACCCCTGCTATGATCGATGCTGCC  
GCGGGTTTTTCGCAGCACACGGGGAGCCGTTAACGAGGCGGGATGGCGTTATATTG  
TTGCCCGTTATGATGGCTATCTGCCCGTACGTATCCGTGCGGTTCCCGAGGGGTCAG  
TGGTACCTAATCACAACGTGCTGATGACAGTCGAATGTGACGATCCTGAAGTTTTCT  
GGCTTGCGTATATCTGGAACTATGTTATTGCGCGTGTGGTATCCGATTACAGTTG  
CGACCCAGAGCTGGCATCTGCGTCAACTTGTCCACCGCTACCTGGAGCAAACAAGT  
GATGACCCAGGACAGTTGCCATTCAAGGTTTCATGATTTTCGGTGCTCGCGGTGTATCT  
AGCGCGAAAGTTCGGCTATTGGGGGAGCAGCTCACCTTGTGTCTTTCATGGGTAGT  
GACACGGTTTTGGGTGTGGCCGCCGCAAACCTGTATTACAATGCTCAAATGGCCGCG  
TTTTCTGTACCCGCGGCGGAGCACAGTACGATTACAGCCTGGGGACGTGCCGGGGA  
AGCAGATGCGTATCGTAATATGTTACGCCAATTCGGTAAACCTGGTGCATCGTGAG  
TGTTGTCAGTGACAGTTATGACTTATTCGCCGCGCTTCGCCTGTGGGGAGGGGAATT  
ACGCCAGGACAGTCATCGACTCTGGGGCTACGCTTGTTCGTACGTCCCGATTCTGGCGA  
CCCTCGCTCCATTGTTCTTCAGACAGTCCGCGCGCTTGATGCTTCATTTGGAGCAACA  
GTGAACGGGAAAGGGTACCGTGTCTGAACCACGTCCGCGTCATTCAAGGCGATGG  
AATTAATGCAGCATCGATCGAGGCAATTCTTGCCGAGTTAGAGGCTGCGGGATATGC  
GGCGGATAACATTGTATTCGGGATGGGAGGTGCCCTGTTACAACAATTAACCGCG  
ACACACAGCGCTTTGCAATGAAGTGCTCAGCAGTCCGTGTTGACGGGGCGTGGCGT  
GAAGTCTGTAAAGACCCGGTGACCGACGCGGGGAAACGTTCTAAGAAAGGACGTCT  
TACTTTTTGCGCAACCGTGTGAGCGGGGAGTACGCCACAGCCACTTTGCCCTTGGC

CTGGGATGATCGCCGCATCGAGGGGGAATGGGAGGATGCTCTGGTGACGGTATTTCG  
AGAATGGGCGTCTTTTACAGGATGTCAGCCTTGACGCGGTCCGCGCGCGCTCAAG  
CCCATGAGTTGGCACCCGCCCTTGTCGACTGA

*Synechocystis sp. PCC 6803 nadV*

ATGAATACTAATCTCATTCTGGATGTGGACTCCTATAAAGTGAGCCACTGGTTGCAG  
TATCCTCCTGACACAACGGCAATGTATTCCTATGTGGAAAGTCGTGGGGGAAGGTAT  
CCTGTCACTGTCTTTTTTGGTCTCCAATACATTTTAAAGCGGTATCTGACTCAATCCA  
TTGAACCCTGGATGGTGGAGGAAGCTAATCGCCTTTTGACAGCCCATGGCTTACCTT  
TCAACTATGGCGGTTGGCGATACATTGCGGAGGATTTGCAGGGTCGTTTACCTGTAC  
GTATTAAGGCGGTTCCAGAGGGCTCGGTCATCCCGGTTCATAATGTTTTGATGACAG  
TGGAATCCACGGACCCAAAGGTTTTTTGGTTAGTTTCCTGGTTAGAACTTTGTTGAT  
GCGGGTTTGGTATCCCATACGGTGGCAACCCAGAGTTGGCATTAAAACAACGCAT  
CTATCAATCCCTATGCCGTA CTGCGGATGATCCTGATGGTGAATCAATTTTAAACT  
CCACGATTTTGGGGCCCGGGGGTTTCTAGTGGTGAATCGTCCGGCATTGGCGGACT  
GGCTCACTTAGTTAATTTCCAAGGTTCTGACACAGTAAAGGCCCTGGTGTATGGGCA  
GCAATATTACA ACTGCCCATGGCGGCCTATTCGATTCCCGCCGCAGAACATTCCAC  
CATTACAGCTTGGGGAAGGGAAGGGGAAGTTTTGGCCTATGAAAATATGTTGACCC  
AGTTTGCCAAGCCAGGGTCGGTGTGGCGGTGGTTTCCGATTCCCTATGATCTCTGGA  
ATGCCATTGACCATCTCTGGGGCGATCACCTAAGGGCACAGGTGCTTGATTCCGGGG  
CTACGGTGGTTATCCGTCCGGATTCAGGTGACCCGGTGGCCATTGTGGCCAAACTT  
TGGAACGGTTGGAGGCTTGTTTTGGCAGCACCTCAACAGTAAGGGCTTTCGAGTTC  
TAAATGCTGTGCGGGTTATCCAAGGGGATGGGGTTGATGAAGAGAGTATCAGCGCC  
ATTCTAGAGAAGACTGAGAGCCTTGGCTTTAGTACTACTAATTTAGCTTTTGGTATG  
GGGGGAGCTTTGTTGCAAAAAGGTGAATCGGGATACCCAAAAAATTTGCCATGAAGTG  
CAGTGAGGTAACGGTGGAGGACAAGGCGATCCCTGTTTATAAAGACCCTGTTACTG  
ATCCTGGTAAA ACTAGCAAAAAGGGGCGATTATCCCTGGTTAAA ACTGACTCTGGTT  
ATGGCACTGTACCCACTTCTTCTGAGGATTTATTGCAGGTTGTCTATGAAAATGGAC  
ATTTACTGCAAGACCAATGCTTGGATGCTATTCGTCAACGAGCCTGGCCATTAATCA  
GGGTCAATGTTCCCGCAAGCTAG

*Synechococcus elongatus PCC 7942 nadV*

ATGGACCTCAATCTTCTGTTCGATACCGACTCATACAAAGTCAGCCACTGGCTGCAA  
TATCCTGCCGATACGACTGCGATCGGAGCTTATTTAGAAAGCCGGGGTGGAGATTGC  
TCGCACACGCTCTTTTTTGGCTTGCAATATCTACTACTGCGTTATTTCTTCCAGCCAA  
TCACTAGCGCTGACATTCAAGAAGCCGCCGCGCTGTTTCAAGCGCATGGGCTGCCTT  
TCAATCAAGCGGGCTGGCAACGAGTTTGGCATCGCTATGGCGGGTATTTACCTTTAC  
GAATTCGGGCTGTCCCGGAAGGTAGCCTTGTCCCCACCGGCAATATCTTGCTGACAG  
TGGAATCGACCGATCCTGAATTGGCTTGGCTGGCCACTTGGGTTGAGACACTACTGC  
TGCGGGTTTGGTATCCGATAACTGTGGCTACACGCAGTTGGCAGCTTCGGCAAATCA



TTCAGCAAGCGCTGGAGCAATCAGCCGAAAATCCAGCAGCTGAAATTGACTTCAA  
CTGCATGACTTTGGATCACGCGGGGTATCGAGCCAAGAAAGTGCTGCAATCGGCGG  
GCTGGCTCATTGGTCAACTTTCAAGGCACTGATACGATCGCTGCGTACTGGCAGG  
ACAGCGCTATTACGATTGCGCGATCGCTGGCTTTTCGATTCCGGCGGCGGAGCATTC  
AACGATTACGGCTTGGGGCCCATCGGGTGAGTTAGATGCTTACCGCAATATGCTCGA  
TCGCTTTGCAAATCCGGGATCTGTGGTGGCTGTTGTATCGGACTCCTATGATCTCTGG  
CATGCCGTCGATCAGCTTTGGGGTGAGGATCTCCGCGATCGCATTTTGCAATCGGGA  
GCAACCGTTGTCATTCGGCCTGACTCAGGCAATCCTGAGCAGATTGTGCCGGAATTA  
CTGCGTCGTTTGGCCGCTAAGTTCGGCTGCGATCGCAATCAGAAGGGTTATCAAGTT  
TTGCGATCGGTGCGGGTGATTCAGGGCGATGGGATCACAGTGGACAGTCTGCCCAA  
AGTTCTGCAAGCGGTTATGGCCGCTGGCTTTAGTGCCAGTAATGTCGCTTTTGGCAT  
GGGTGGCGGGCTGTTGCAGCAGGTCAATCGCGATACCCAACGCTTTGCCTACAAGTG  
CAGCTGGATCGAGCGATCGGGACAAGTGATTCCCATTTGCAAGCGACCAGCCACGG  
ATCTGCGCAAGGCTAGCAAAGCAGGACGCTTGGATTTAATTCGCGATCGCGAGGGG  
CAATACCGAACAGTCTCGTTACTGACGTCAGAGCCTGACCCGCAATCCTGCCTGCAA  
ACGGTGTTTGAAAATGGTGCATCGTGCGGCGACAAAGCTTGCAGGAAATCCGCGA  
TCGCGCTCGTTCTGAGACACGCTAG

***Haemophilus ducreyi nadV (Codon optimized for E. coli)***

ATGGATAATTTATTAATAACTCTTCGCGTGCTTCGGCCATTCCGTCGCTGTTGTGTG  
ACTTTTATAAGACATCGCACCGCATTATGTATCCCGAGTGTAGTCAAATCATTACTC  
GACCTTCACACCACGTTCCAATGAACAAGCTCCATACCTGACACAAGTTGTCTCATT  
CGGCTTTCAGGCATTTATTATTAAGTACCTTATTCATTACTTCAACGACAATTTTTTC  
TCACGCGATAAACATGATGTAGTTACTGAATACTCGGCCTTTATCGAGAAGACTCTT  
CAATTAGAAGATACCGGAGAGCATATCGCGAAGCTGCACGAATTGGGCTACCTTCC  
GATTCGTATCAAGGCAATCCCCGAGGGGAAAACCGTGGCAATCAAGGTCCCTGTAA  
TGACCATCGAGAATACCCATAGTGACTTCTTTTGGTTAACCAATTACTTGGAAACAT  
TGATCAACGTTTCGTTGTGGCAGCCGATGACCTCTGCCTCGATTGCATTCGCATATCG  
TACTGCCCTTATCAAGTTTGCGAATGAAACGTGCGATAATCAAGAGCATGTCCCCTT  
TCAGAGCCACGATTTTTCTATGCGTGGAATGAGTTCCTGGAATCAGCCGAAACATC  
TGGTGCTGGACACTTAACCTTCGTTCCCTGGGTACGGACACCATTCCGGCGCTTTCCTTT  
GTCGAGGCTTATTACGGCAGTAGTAGCCTTATTGGTACATCGATCCCTGCAAGTGAA  
CATTCTGTGATGTCCTCACATGGAGTTGACGAGTTAAGTACTTTCCGCTACTTAATGG  
CTAAGTTCCCGCATAACATGCTGAGTATCGTGAGTGATACGACTGACTTTTGGCACA  
ATATCACGGTCAACCTTCCGTTATTGAAGCAAGAAATCATTGCGCGTCCAGAGAATG  
CTCGTCTGGTTATCCGCCCTGATTCAGGGAACCTTCTTTGCAATCATCTGCGGAGACCC  
AACCGCGGACACCGAACACGAACGCAAGGGTCTTATCGAATGTTTGTGGGACATCT  
TCGGAGGGACTGTCAACCAAAGGGTTATAAAGTTATCAATCCACACATCGGAGCG  
ATCTATGGGGACGGCGTAACCTATGAAAAGATGTTCAAGATCTTGGAAAGGTCTTCAA  
GCCAAAGGATTTGCCTCCAGCAACATTGTATTTGGCGTGGGGGCGCAGACTTACCAG  
CGTAATACTCGCGATACATTGGGATTTGCACTGAAGGCCACCTCTATTACTATTAAT

GGAGAGGAGAAGGCAATTTTCAAGAATCCCAAACAGATGATGGCTTTAAGAAGAG  
CCAGAAGGGACGCGTCAAAGTTCTTTCCCGGATACTTACGTAGATGGCTTAACAAG  
CGCTGACGACTTTAGCGACGACCTTCTGGAGCTGCTTTTCGAGGACGGCAAGCTTTT  
ACGCCAGACCGATTTTCGACGAAATTCGTCAAATCTGCTTGTGTCCCGTACCACTTT  
GTAA

## References

- [1] Stancek M, Isaksson LA, Rydén-Aulin M. *fusB* is an Allele of *nadD*, Encoding Nicotinate Mononucleotide Adenyltransferase in *Escherichia coli*. *Microbiology*. 2003;149(9):2427-33.
